# Supplementary material for: A nickel-modified polyoxometalate towards a highly efficient catalyst for selective oxidation of hydrocarbons
Source: Royal Society of Chemistry journal article supplement (doi:10.1039/c4ta02214a), 2014-06-18
Supplement: c4ta02214a1.pdf [file c4ta02214a1.pdf]

# **A nickel-modified polyoxometalate towards high efficient hydrocarbon selective oxidation**

## **(Supporting Information)**

### **X-ray crystallography**

Suitable single crystal with dimensions of  $0.12 \times 0.12 \times 0.10$  mm for **1** was glued on a glass fiber. Diffraction intensity data were collected on a Bruker Smart Apex-II CCD diffractometer with Mo K $\alpha$  mono-chromated radiation ( $\lambda = 0.71073$  Å) at 296 K. Absorption corrections were applied using the multiscan technique. The structures were solved by the direct method and refined by the full-matrix least-squares method on  $F^2$  using the *SHELXL-97* software.<sup>1</sup> All of the non-hydrogen atoms were refined anisotropically. The organic hydrogen atoms were generated geometrically. The aqua hydrogen atoms were located from difference Fourier maps. A summary of crystal data and structure refinement for **1** is provided in Table S1. Selected bond lengths and angles are listed in Table S2.

### **Reference**

(1) (a) Sheldrick, G. M. *SHELXS-97*, Program for Crystal Structure Solution. University of Göttingen, Germany, **1997**; (b) Sheldrick, G. M. *SHELXL-97*, Program for Crystal Structure Refinement. University of Göttingen, Germany, **1997**.

### **Materials and General Methods**

All analytical reagents were purchased from commercial sources and used without further purification. Elemental analyses of C, H, and N were performed using an EA1110 elemental analyzer. Scanning electron microscopy (SEM) images were taken on a FEI-quanta 200 scanning electron microscope with acceleration voltage of 20 kV. The IR spectrum was recorded in the range of 4000-400  $\text{cm}^{-1}$  on a Nicolet 360 spectrometer with a pressed KBr pellet. The TG-DTA analysis was carried out by Universal Analysis 2000 thermogravimetric analyzer (TGA) in  $\text{N}_2$  with a heating rate of 10  $^\circ\text{C min}^{-1}$ . Powder X-ray diffraction (XRPD) data were collected on an X'Pert-ProMPD (Holand) D/max- $\gamma$ A X-ray diffractometer with Cu K $\alpha$  radiation in a flat plate geometry. Electrochemical measurements were performed with a CHI 660C workstation (CH Instruments, Chenhua, Shanghai, China). All electrochemical experiments were carried out at

room temperature. A conventional three-electrode system was used. Ag/AgCl electrode was used as a reference electrode, and a Pt wire was used as a counter electrode. Chemically bulk-modified carbon paste electrode was used as the working electrode. The GC measurements were performed in a Varian 3400 GC column with a cross-linked 5% PhMe silicone column (25 m × 0.20 mm × 0.33 μm) and a FID detector under the following conditions: carrier gas (N<sub>2</sub>) at 140 K; temperature program 60 °C, 1 min, 15 °C/min, 180 °C, 15 min; split ratio, 10 : 1; injector, 300 °C; detector, 300 °C.

### **Catalytic selective oxidation of cyclooctene**

The selective oxidation of cyclooctene was carried out in a 50 mL round bottom flask with water condenser and continuous magnetic stirring. 200 mg catalyst and 0.12 g tert-butyl hydroperoxide (TBHP) were put into 10 mL cyclooctene. The mixture was stirred for 48 h at 80 °C. Different samples were collected every 8 hours. After filtering off the catalyst, the conversion of cyclooctene and the selectivity of oxidation products were determined by GC analysis; the variance of values is estimated to be less than ±2%.

**Synthesis of [Ni<sub>2</sub>(fsa)<sub>7</sub>(H<sub>2</sub>O)(SiMo<sub>12</sub>O<sub>40</sub>)]·H<sub>2</sub>O (1):** A mixture of Na<sub>2</sub>SiO<sub>3</sub>·2H<sub>2</sub>O (0.03 g), NaMoO<sub>4</sub> (0.3 g), Ni(Ac)<sub>2</sub> (0.3 g), fsa (0.12 g) and distilled water (10 ml) were stirred for 1 h in room temperature. The pH was then adjusted to 1.50 by the addition of 1M HCl. Then the above mixture was transferred into a Teflon-lined stainless vessel (15 ml) and heated to 150 °C for 3 days. The reactor was slowly cooled to room temperature over a period of 16 h. Light yellow crystals of **1** were filtered and washed with distilled water (yield of about 30% based on Mo). Elemental analysis (%) calcd for C<sub>112</sub>H<sub>109</sub>F<sub>14</sub>Mo<sub>12</sub>N<sub>21</sub>Ni<sub>2</sub>O<sub>42</sub>Si<sub>8</sub>: C 32.21, H 2.52, N 7.04. Found: C 32.25, H 2.57, N 7.11. IR (KBr pellet, cm<sup>-1</sup>): 1589, 1504, 1234, 1165, 1106, 958, 905, 793.

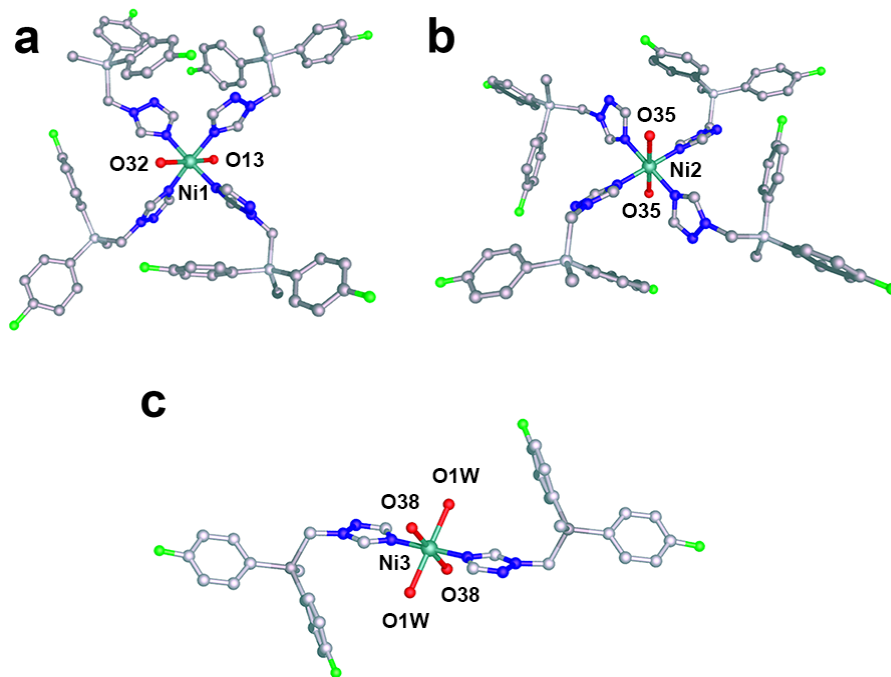

**Figure S1.** Ball-stick representations of coordination modes of three independent Ni atoms. All H atoms and free lattice water molecule are omitted for clarity.

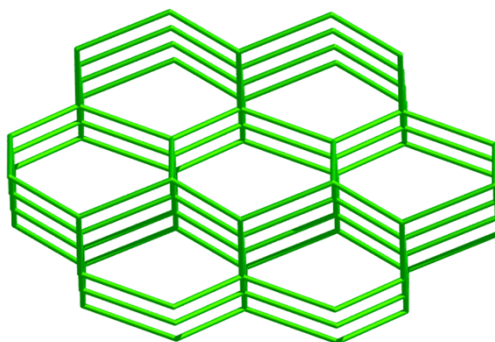

**Figure S2.** View of the topology of compound 1.

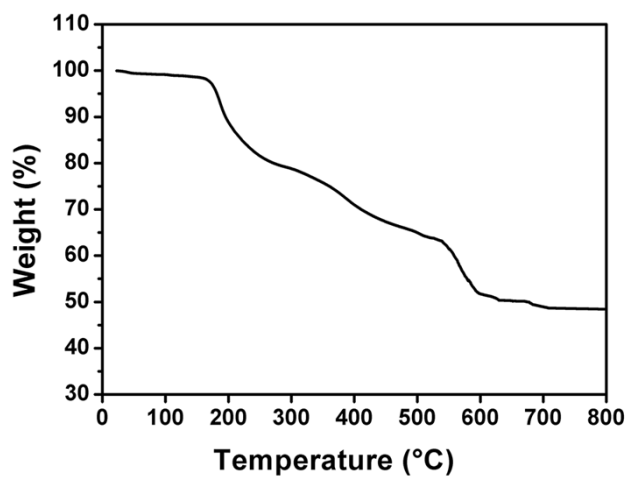

**Figure S3.** TG curve of compound **1** under N<sub>2</sub> atmosphere.

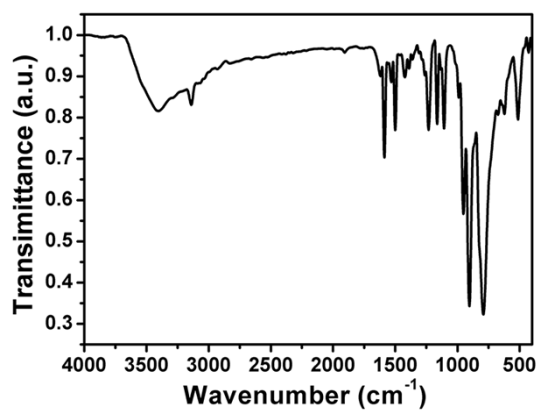

**Figure S4.** FT-IR spectrum of compound **1**. Characteristic bands at 958, 905, and 793 cm<sup>-1</sup> are attributed to  $\nu(\text{Si-O})$ ,  $\nu(\text{Mo=O})$ , and  $\nu(\text{Mo-O-Mo})$  vibrations, respectively.<sup>1-3</sup> Moreover, the characteristic bands in the regions of 1589–1106cm<sup>-1</sup> can be regarded as features of the fsa ligands.<sup>4</sup>

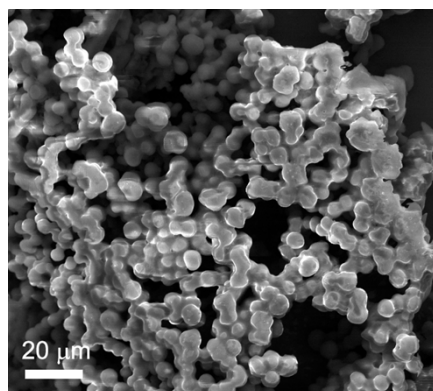

**Figure S5.** The SEM image of the compound **1**.

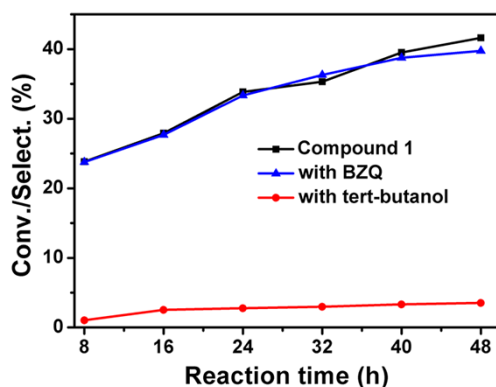

**Figure S6.** Catalysis activities of compound **1** in reactive species trapping experiments with two types of reactive species scavengers.

**Table S1.** Crystal data and structure refinement for **1**.

|                              |                                                   |
|------------------------------|---------------------------------------------------|
| Empirical formula            | $C_{112}H_{109}F_{14}Mo_{12}N_{21}Ni_2O_{42}Si_8$ |
| Formula weight               | 4180.59                                           |
| T /K                         | 296(2)                                            |
| Crystal system               | monoclinic                                        |
| Space group                  | $P2_1/c$                                          |
| $a$ (Å)                      | 24.369(5)                                         |
| $b$ (Å)                      | 24.336(4)                                         |
| $c$ (Å)                      | 25.550(5)                                         |
| $\alpha$ /°                  | 90.00                                             |
| $\beta$ /°                   | 107.319(4)                                        |
| $\gamma$ /°                  | 90.00                                             |
| $V$ (Å <sup>3</sup> )        | 14465(5)                                          |
| $Z$                          | 4                                                 |
| $D_c$ (g/cm <sup>3</sup> )   | 1.918                                             |
| $\mu$ (mm <sup>-1</sup> )    | 1.423                                             |
| GOF                          | 0.994                                             |
| Reflections collected        | 73009                                             |
| Independent reflections      | 25217                                             |
| Parameters                   | 1903                                              |
| $R_{int}$                    | 0.1485                                            |
| $R_1^a$ [ $I > 2\sigma(I)$ ] | 0.0818                                            |
| $wR_2^b$ [all data]          | 0.2224                                            |

$$^{[a]}R_1 = \sum ||F_o| - |F_c|| / \sum |F_o|; \quad ^{[b]}wR_2 = \sum [w(F_o^2 - F_c^2)^2] / \sum [w(F_o^2)^2]^{1/2}$$

**Table S2.** Selected bond lengths (Å) and angles (°) for compound **1**.

|             |          |            |           |
|-------------|----------|------------|-----------|
| Ni(1)-O(32) | 2.307(9) | Ni(1)-N(1) | 2.001(10) |
|-------------|----------|------------|-----------|

|                       |           |                       |           |
|-----------------------|-----------|-----------------------|-----------|
| Ni(1)-N(4)            | 2.007(11) | Ni(1)-N(7)            | 2.011(11) |
| Ni(1)-N(10)           | 2.003(11) | Ni(2)-O(35)           | 2.366(9)  |
| Ni(2)-O(35)#1         | 2.366(9)  | Ni(2)-N(13)#1         | 2.073(12) |
| Ni(2)-N(16)#1         | 1.971(12) | Ni(2)-N(13)           | 2.073(12) |
| Ni(2)-N(16)           | 1.971(12) | Ni(3)-O(1W)           | 2.254(10) |
| Ni(3)-O(38)#2         | 2.068(9)  | Ni(3)-N(19)#2         | 1.950(11) |
| Ni(3)-N(19)           | 1.950(11) | Ni(3)-O(1W)#2         | 2.254(10) |
| Ni(3)-O(38)           | 2.068(9)  | N(1)-Ni(1)-O(32)      | 87.4(4)   |
| N(1)-Ni(1)-N(4)       | 91.7(4)   | N(1)-Ni(1)-N(7)       | 175.2(4)  |
| N(1)-Ni(1)-N(10)      | 91.0(4)   | N(4)-Ni(1)-O(32)      | 88.1(4)   |
| N(4)-Ni(1)-N(7)       | 89.7(5)   | N(7)-Ni(1)-O(32)      | 97.2(4)   |
| N(10)-Ni(1)-O(32)     | 92.9(4)   | N(10)-Ni(1)-N(4)      | 177.1(5)  |
| N(10)-Ni(1)-N(7)      | 87.5(4)   | O(35)#1-Ni(2)-O(35)   | 180.0(6)  |
| N(13)-Ni(2)-N(13)     | 180.0(10) | N(13)#1-Ni(2)-O(35)   | 85.3(4)   |
| N(16)-Ni(2)-O(35)     | 92.0(4)   | N(16)#1-Ni(2)-O(35)   | 88.0(4)   |
| N(16)-Ni(2)-N(13)#1   | 90.0(5)   | N(16)-Ni(2)-O(35)#1   | 88.0(4)   |
| N(16)#1-Ni(2)-N(13)   | 90.0(5)   | N(16)#1-Ni(2)-N(13)#1 | 90.0(5)   |
| N(16)#1-Ni(2)-N(16)   | 180.0(9)  | N(16)-Ni(2)-N(13)     | 90.0(5)   |
| O(38)#2-Ni(3)-O(1W)   | 91.9(4)   | O(1W)#2-Ni(3)-O(1W)   | 180.0(7)  |
| O(38)#2-Ni(3)-O(1W)#2 | 88.1(4)   | O(38)-Ni(3)-O(1W)     | 88.1(4)   |
| O(38)-Ni(3)-O(38)#2   | 180.0(6)  | O(38)-Ni(3)-O(1W)#2   | 91.9(4)   |
| N(19)#2-Ni(3)-O(1W)#2 | 89.9(4)   | N(19)-Ni(3)-O(1W)#2   | 90.1(4)   |
| N(19)-Ni(3)-O(1W)     | 89.9(4)   | N(19)#2-Ni(3)-O(1W)   | 90.1(4)   |
| N(19)-Ni(3)-O(38)#2   | 91.4(4)   | N(19)#2-Ni(3)-O(38)#2 | 88.6(4)   |

Symmetry transformations used to generate equivalent atoms: #1 1-X,-Y,-Z; #2 -X,-Y,-Z.

**Table S3.** Effect of variety of reaction time on selective oxidation of cyclooctene using compound **1** as catalyst.

| Reaction time (h) | Product Selectivity (%)                                                             |                                                                                     | Conversion (%) | $\Sigma_{\text{sel}}\text{C}_8^{\S}$ |
|-------------------|-------------------------------------------------------------------------------------|-------------------------------------------------------------------------------------|----------------|--------------------------------------|
|                   | 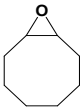 |  |                |                                      |
| 0                 | 0                                                                                   | 0                                                                                   | 0              | 0                                    |
| 8                 | 84.53                                                                               | 15.47                                                                               | 23.81          | 100                                  |
| 16                | 86.08                                                                               | 13.79                                                                               | 27.92          | 99.87                                |
| 24                | 91.38                                                                               | 8.27                                                                                | 33.86          | 99.65                                |
| 32                | 93.15                                                                               | 6.21                                                                                | 35.33          | 99.36                                |
| 40                | 95.83                                                                               | 3.14                                                                                | 39.52          | 98.97                                |
| 48                | 97.21                                                                               | 1.64                                                                                | 41.63          | 98.85                                |

Reaction conditions: Compound **1** (200 mg), cyclooctene (10 mL), TBHP (0.12 g), 80 °C.  $\S$ Total selectivity to C<sub>8</sub> partial oxidation products.

**Table S4.** Effect of different materials as catalysts on selective oxidation of cyclooctene.

| catalysts | Product Selectivity (%) | Conversion (%) | $\Sigma_{\text{sel}}\text{C}_8^{\S}$ |
|-----------|-------------------------|----------------|--------------------------------------|
|-----------|-------------------------|----------------|--------------------------------------|

---

---

|                     |                                                                                   |                                                                                   |       |       |
|---------------------|-----------------------------------------------------------------------------------|-----------------------------------------------------------------------------------|-------|-------|
|                     | 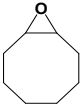 |  |       |       |
| Compound <b>1</b>   | 97.21                                                                             | 1.64                                                                              | 41.63 | 98.85 |
| Ni(Ac) <sub>2</sub> | 83.97                                                                             | 13.39                                                                             | 15.14 | 97.36 |
| SiMo <sub>12</sub>  | 72.34                                                                             | 24.88                                                                             | 5.43  | 97.22 |

Reaction conditions: catalysts (200 mg), cyclooctene (10 mL), TBHP (0.12 g), 80 °C. §Total selectivity to C<sub>8</sub> partial oxidation products.

---

#### References in Supporting Information

1. T. Ueda, J.-i. Nambu, H. Yokota and M. Hojo, *Polyhedron*, 2009, **28**, 43-48.
2. M. Nakayama, T. Ii, H. Komatsu and K. Ogura, *Chem. Commun.*, 2004, 1098-1099.
3. C. Rocchiccioli-Deltcheff, M. Fourer, R. Frank and R. Thouvenot, *Inorg. Chem*, 1983, **22**, 207.
4. H. Itoh, H. Kajino, T. Tsukiyama, J. Tobitsuka, H. Ohta, Y. Takahi, M. Tsuda and H. Takeshiba, *Bioorgan. Med. Chem.*, 2002, **10**, 4029-4034.
